# Supplementary material for: Mesoporous silica-coated luminescent Eu3+doped GdVO4nanoparticles for multimodal imaging and drug delivery
Source: Royal Society of Chemistry journal article supplement (doi:10.1039/c4ra06628f), 2014-09-12
Supplement: c4ra06628f1.pdf [file c4ra06628f1.pdf]

Supplementary Information

## **Mesoporous silica-coated luminescent Eu<sup>3+</sup> doped GdVO<sub>4</sub> nanoparticles for multimodal imaging and drug delivery**

Taeho Kim,<sup>a,b</sup> Nohyun Lee,<sup>c</sup> Yong Il Park,<sup>a,b</sup> Jangwon Kim,<sup>a,b</sup> Jaeyun Kim,<sup>d</sup> Eun Yeol Lee,<sup>e</sup>  
Minyoung Yi,<sup>e</sup> Bong-Geun Kim,<sup>f</sup> Taeghwan Hyeon,<sup>a,b</sup> Taekyung Yu,<sup>\*e</sup> Hyon Bin Na<sup>\*f</sup>

<sup>a</sup>*Center for Nanoparticle Research, Institute for Basic Science (IBS), Seoul 151-742, Korea*

<sup>b</sup>*School of Chemical and Biological Engineering, Seoul National University, Seoul 151-742, Korea*

<sup>c</sup>*School of Advanced Materials Engineering, Kookmin University, Seoul 136-702, Korea*

<sup>d</sup>*School of Chemical Engineering, Sungkyunkwan University, Suwon 440-746, Korea*

<sup>e</sup>*Department of Chemical Engineering, Kyung Hee University, Yongin, 446-701, Korea*

<sup>f</sup>*Department of Chemical Engineering, Myongji University, Yongin, 449-728, Korea*

**Table S1.** ICP result of GdVO<sub>4</sub>:Eu<sup>3+</sup> NPs synthesized using various ratios of Gd/Eu

| Insert ratio of Gd/Eu | mol fraction of GdVO <sub>4</sub> :Eu <sup>3+</sup> NPs (mol%) |       |
|-----------------------|----------------------------------------------------------------|-------|
|                       | Eu                                                             | Gd    |
| 1/99                  | 1.58                                                           | 98.82 |
| 5/95                  | 5.73                                                           | 94.27 |
| 9/91                  | 10.04                                                          | 89.96 |
| 11/89                 | 12.07                                                          | 87.93 |
| 15/85                 | 16.35                                                          | 83.66 |

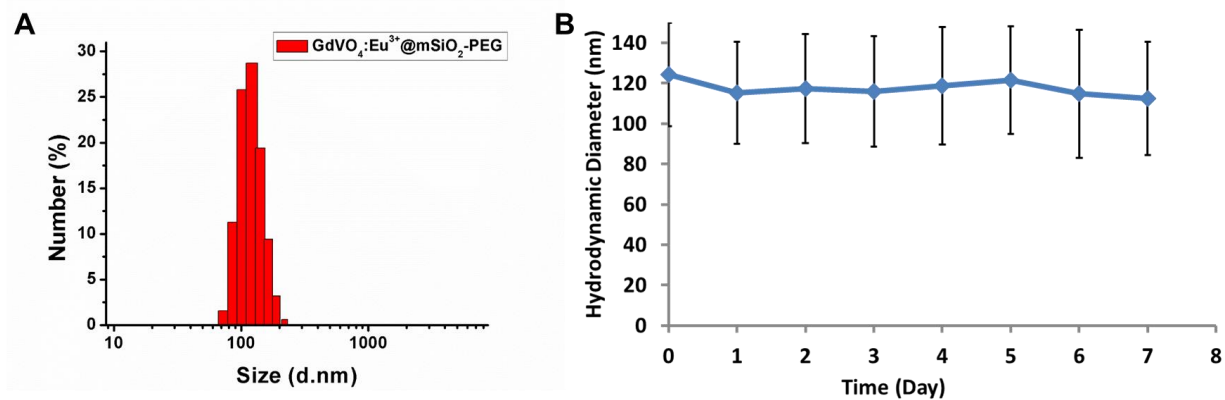

**Fig. S1** Hydrodynamic diameters of GdVO<sub>4</sub>:Eu<sup>3+</sup>@mSiO<sub>2</sub>-PEG NPs in PBS as measured by dynamic light scattering (DLS). (a) The average hydrodynamic diameters was 124 nm on day 0 and (b) maintained at 110-125 nm for over 7 days.

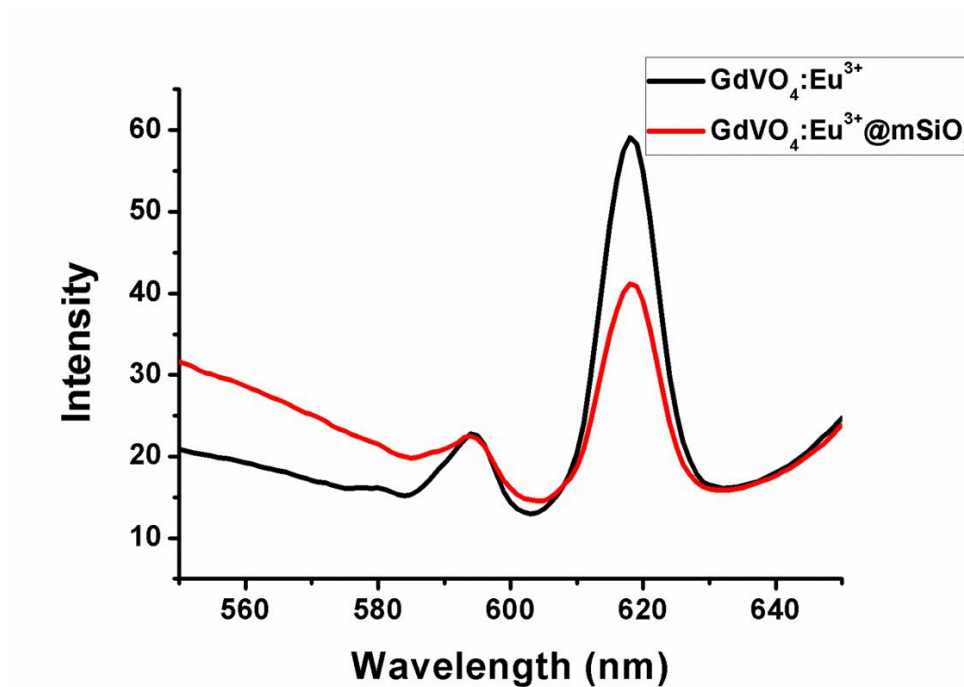

**Fig. S2** Room temperature PL spectra of GdVO<sub>4</sub>:Eu<sup>3+</sup> NPs and GdVO<sub>4</sub>:Eu<sup>3+</sup>@mSiO<sub>2</sub> NPs (at the same concentration of Eu<sup>3+</sup>; 0.01 mg Eu/mL) under UV irradiation, showing 70% of PL efficiency of GdVO<sub>4</sub>:Eu<sup>3+</sup> NPs was maintained after mesoporous silica coatings.

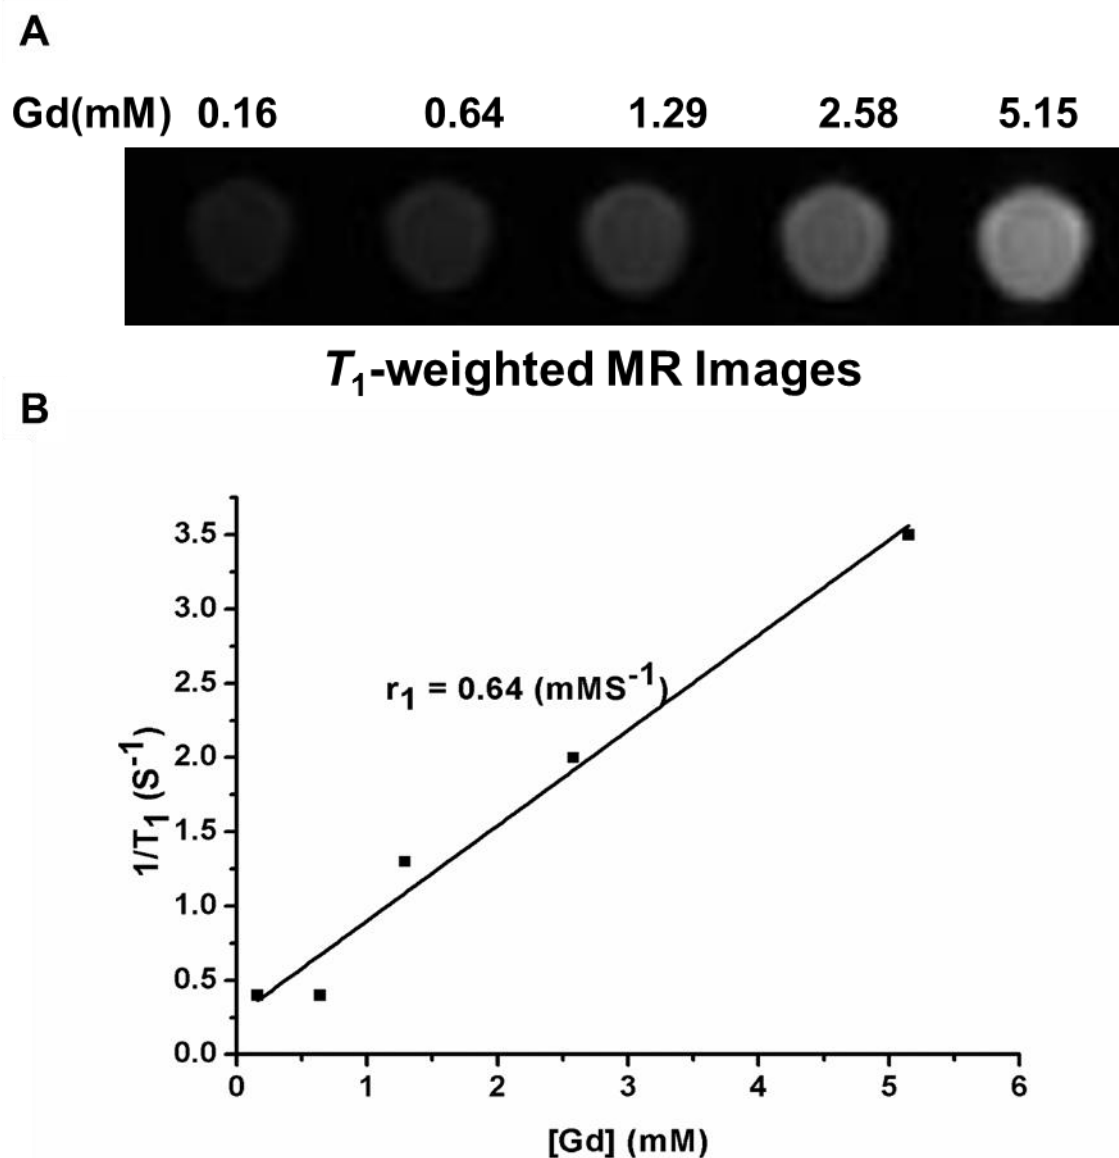

**Fig. S3** MR property of the  $GdVO_4:Eu^{3+}@dSiO_2$  NPs. (A)  $T_1$ -weighted MR images of the  $GdVO_4:Eu^{3+}@dSiO_2$ -PEG NP dispersion in water. The contents of Gd in the dispersions are indicated above the images. (B) Linear plot of Gd concentration versus  $1/T_1$  with a relaxivity value ( $r_1$ ) of  $0.64 \text{ mM}^{-1} \text{ s}^{-1}$ .

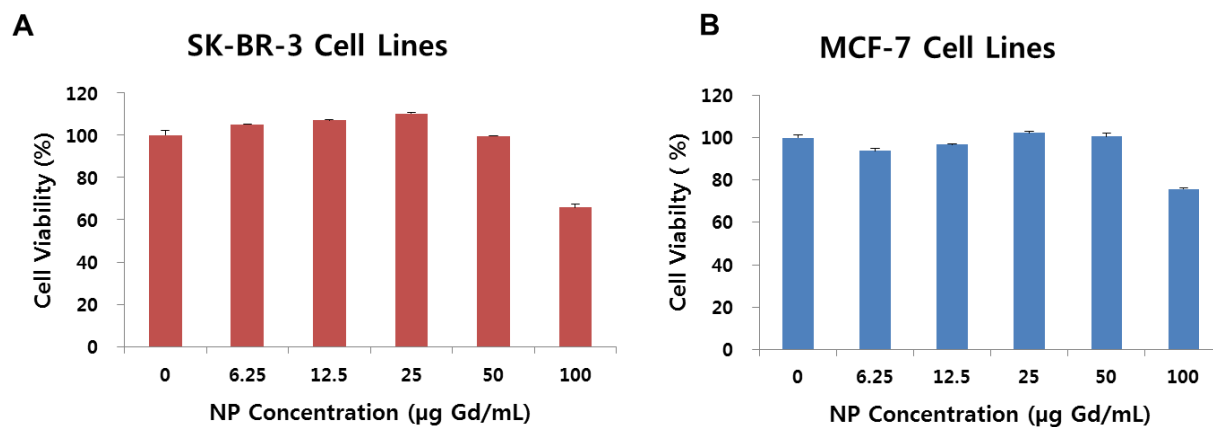

**Fig. S4** Assessment of the viability of SK-BR-3 cells (A) and MCF-7 cells (B) by MTT assay after a 24h incubation with GdVO<sub>4</sub>:Eu<sup>3+</sup>@mSiO<sub>2</sub>-PEG NPs of various concentrations (0, 6.25, 12.5, 25, 50, and 100 µg Gd/mL).

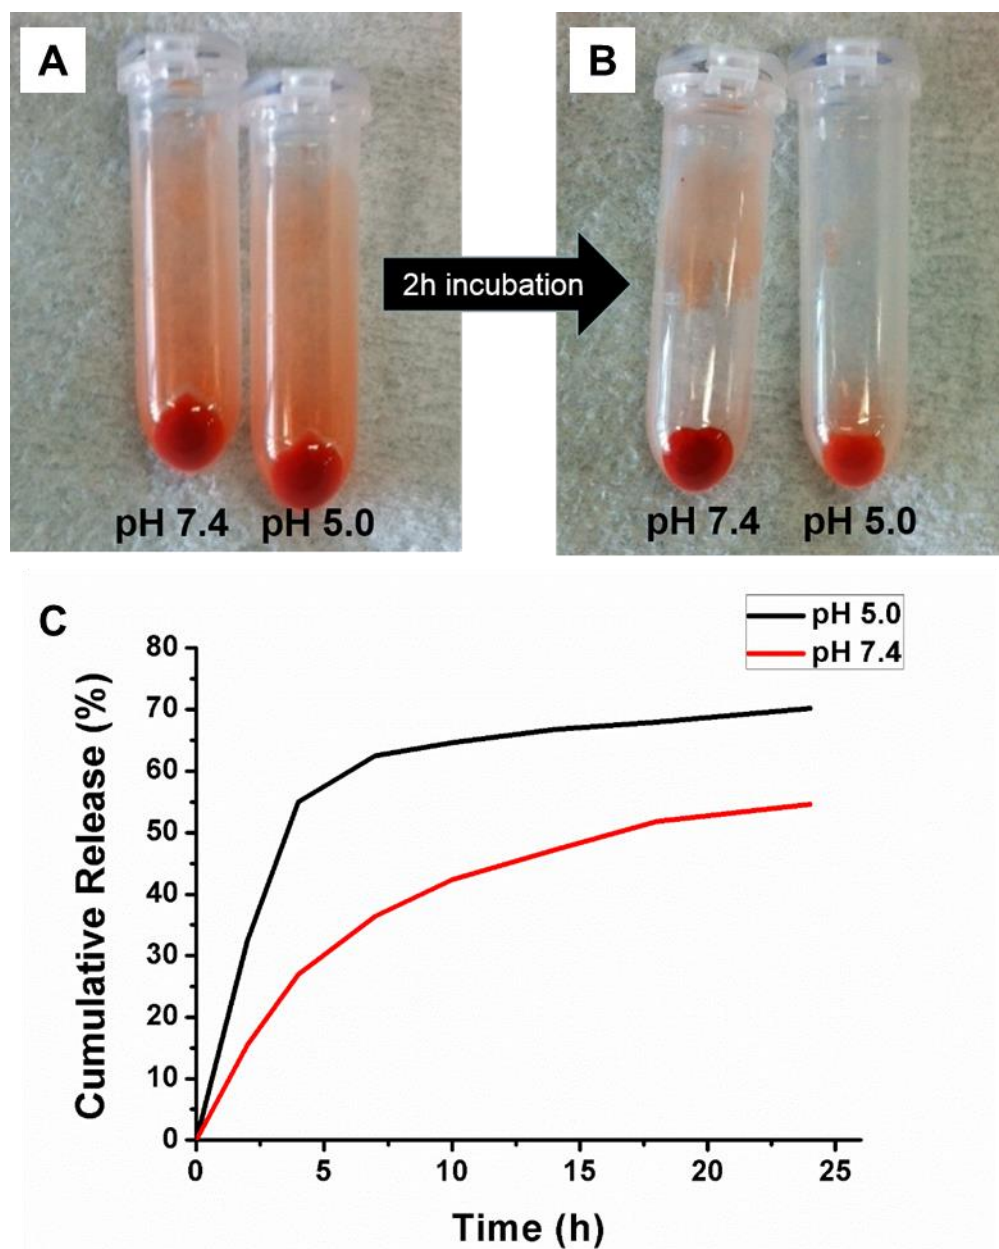

**Fig. S5** DOX release profile. Photographs of DOX loaded NPs (A) after DOX loading step, and (B) after 2h incubation. (C) Cumulative release of DOX for 24h at different pHs (black: pH 5.0, red: pH 7.4).

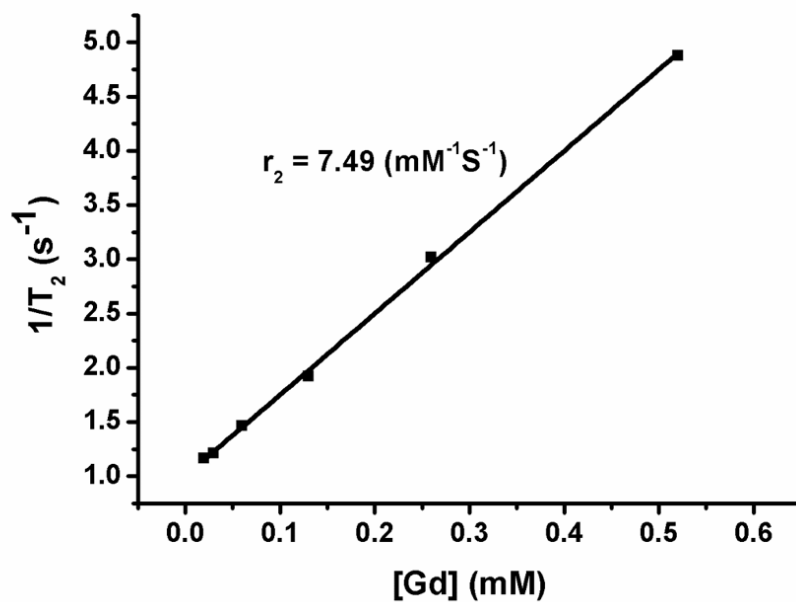

**Fig. S6** MR property of the  $GdVO_4:Eu^{3+}@mSiO_2$  NPs. Linear plots of Gd concentration versus  $1/T_2$  with a relaxivity value ( $r_2$ ) of  $7.49 \text{ mM}^{-1}\text{S}^{-1}$ .



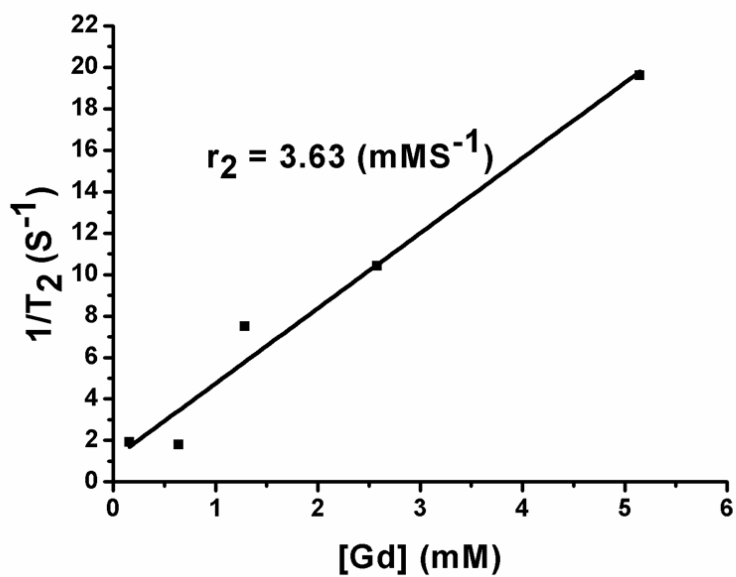

**Fig. S7** MR property of the  $GdVO_4:Eu^{3+}@dSiO_2$  NPs. Linear plots of Gd concentration versus  $1/T_2$  with a relaxivity value ( $r_2$ ) of  $3.63 \text{ mM}^{-1}\text{S}^{-1}$ .

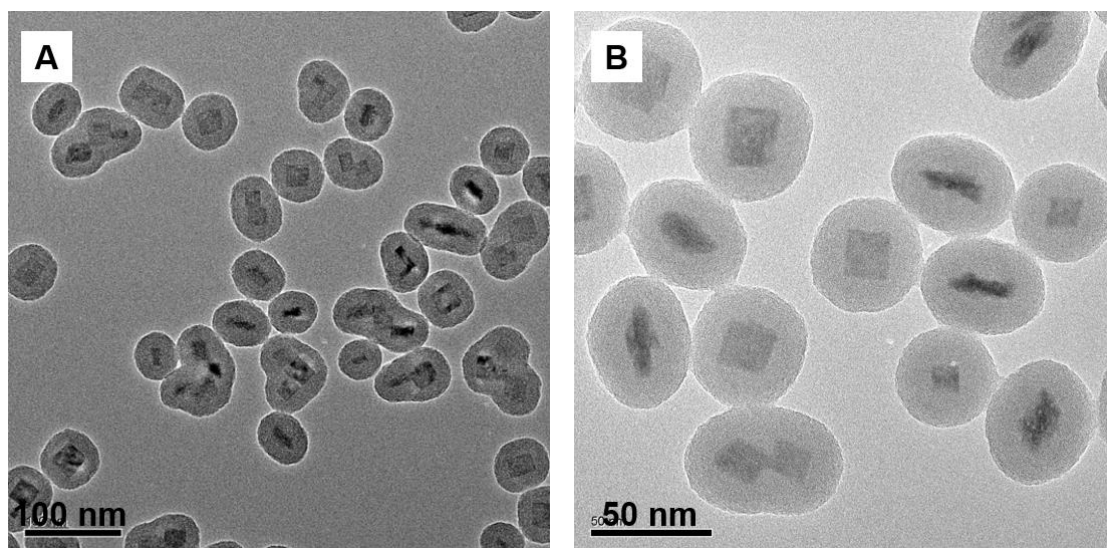

**Fig. S8** TEM and HRTEM images of dense silica coated  $\text{GdVO}_4:\text{Eu}^{3+}$  NPs ( $\text{GdVO}_4:\text{Eu}^{3+}@\text{dSiO}_2$  NPs).
